# Supplementary material
Source: PubMed Central journal article supplement (PMC5799818)
Supplement: cr20181x3.pdf [file cr20181x3.pdf]

Figure S3

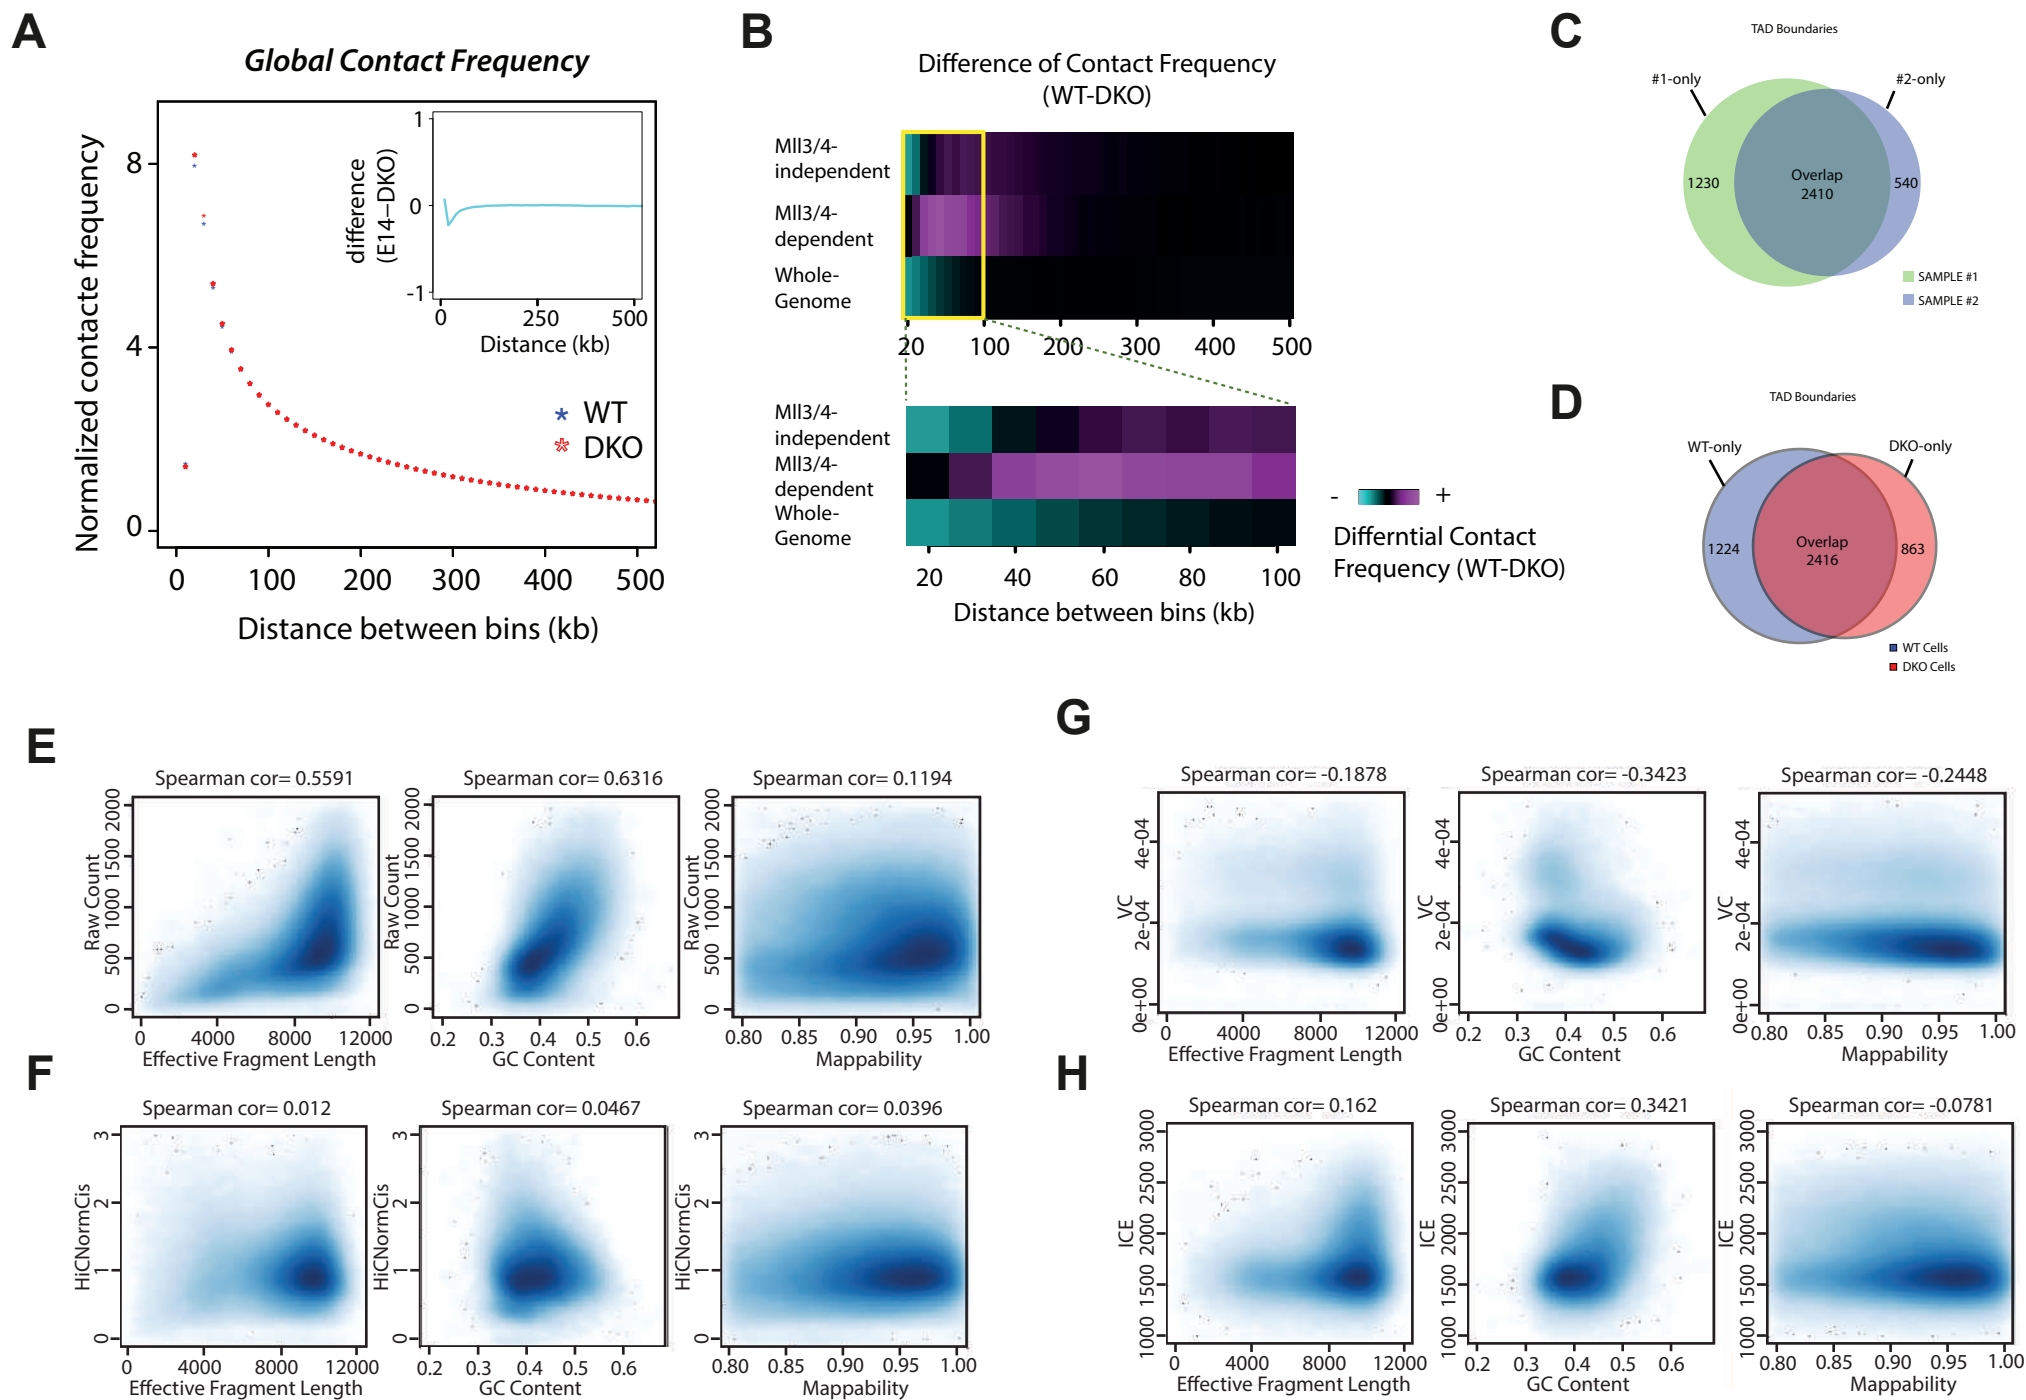

**Figure S3. H3K4me1 does not Affect Global Contact Frequency but is Required for FIREs, Related to Figure 2**

**(A)** Global contact frequency is not obviously affected by Mll3/4 depletion. x-axis shows the distance between two bins. Y-axis is the average value of normalized Hi-C contact frequency. Blue stars, data from WT cells. Red stars, data from DKO cells. Inset shows the subtracted values between two cell types.

**(B)** Heatmap showing the difference in normalized intra-chromosomal contact frequency at various distance between WT and DKO cells for chromatin regions among different classes of H3K4me1 regions. Mll3/4-independent bins include only Mll3/4-independent H3K4me1 regions; Mll3/4-dependent bins include only Mll3/4-dependent H3K4me1 regions; Whole-Genome, all bins for comparison. Color key shows the normalized differential contact frequency.

**(C)** Comparison of TAD boundaries between two biological replicates of WT cells. Note that the majority of TAD boundaries are shared by the two samples.

**(D)** Comparison of TAD boundaries between WT and DKO cells. Note that the difference is of the similar magnitude as biological replicates shown in panel **(C)**.

**(E)** Scatter plot showing that the raw counts of Hi-C libraries are correlated with fragment length (left), GC content (middle) and mappability (right).

**(F)** Scatter plot showing after HiCNormCis normalization, the interaction frequency is no longer correlated with the three main bias factors mentioned in **(E)**.

**(G)-(H)** Similar to **(F)**, Scatter plot shows after VC or ICE normalization, the interaction frequency is still correlated with the three main bias factors mentioned
